# Supplementary material for: Function and firing of the Streptomyces coelicolor contractile injection system requires the membrane protein CisA
Source: eLife. 2025 Jul 8;14:RP104064. doi: 10.7554/eLife.104064 (PMC12237407; doi:10.7554/eLife.104064)
Supplement: Figure 1—figure supplement 1—source data 1. [file elife-104064-fig1-figsupp1-data1.xlsx]

## Sheet: Genome accession numbers 
Genomes sequences used for reciprocal BLAST search to identify CisA homologs
Organism	Accession	Lineage
Actinosynnema mirum DSM 43827	GCA_000023245.1	cellular organisms; Bacteria; Terrabacteria group; Actinomycetota; Actinomycetes; Pseudonocardiales; Pseudonocardiaceae; Actinosynnema; Actinosynnema mirum; Actinosynnema mirum DSM 43827
Allocoleopsis franciscana PCC 7113	GCA_000317515.1	cellular organisms; Bacteria; Terrabacteria group; Cyanobacteriota/Melainabacteria group; Cyanobacteriota; Cyanophyceae; Oscillatoriophycideae; Oscillatoriales; Coleofasciculaceae; Allocoleopsis; Allocoleopsis franciscana; Allocoleopsis franciscana PCC 7113
Amycolatopsis mediterranei S699	GCA_000220945.1	cellular organisms; Bacteria; Terrabacteria group; Actinomycetota; Actinomycetes; Pseudonocardiales; Pseudonocardiaceae; Amycolatopsis; Amycolatopsis mediterranei; Amycolatopsis mediterranei S699
Amycolatopsis mediterranei U32	GCA_000196835.1	cellular organisms; Bacteria; Terrabacteria group; Actinomycetota; Actinomycetes; Pseudonocardiales; Pseudonocardiaceae; Amycolatopsis; Amycolatopsis mediterranei; Amycolatopsis mediterranei U32
Catenulispora acidiphila DSM 44928	GCA_000024025.1	cellular organisms; Bacteria; Terrabacteria group; Actinomycetota; Actinomycetes; Catenulisporales; Catenulisporaceae; Catenulispora; Catenulispora acidiphila; Catenulispora acidiphila DSM 44928
Cellulomonas fimi ATCC 484	GCA_000212695.1	cellular organisms; Bacteria; Terrabacteria group; Actinomycetota; Actinomycetes; Micrococcales; Cellulomonadaceae; Cellulomonas; Cellulomonas fimi; Cellulomonas fimi ATCC 484
Cellulomonas flavigena DSM 20109	GCA_000092865.1	cellular organisms; Bacteria; Terrabacteria group; Actinomycetota; Actinomycetes; Micrococcales; Cellulomonadaceae; Cellulomonas; Cellulomonas flavigena; Cellulomonas flavigena DSM 20109
Cylindrospermum stagnale PCC 7417	GCA_000317535.1	cellular organisms; Bacteria; Terrabacteria group; Cyanobacteriota/Melainabacteria group; Cyanobacteriota; Cyanophyceae; Nostocales; Nostocaceae; Cylindrospermum; Cylindrospermum stagnale; Cylindrospermum stagnale PCC 7417
Deinococcus deserti VCD115	GCA_000020685.1	cellular organisms; Bacteria; Terrabacteria group; Deinococcota; Deinococci; Deinococcales; Deinococcaceae; Deinococcus; Deinococcus deserti; Deinococcus deserti VCD115
Frankia sp. EAN1pec	GCA_000018005.1	cellular organisms; Bacteria; Terrabacteria group; Actinomycetota; Actinomycetes; Frankiales; Frankiaceae; Parafrankia; unclassified Parafrankia; Parafrankia sp. EAN1pec
Ilumatobacter coccineus YM16-304	GCA_000348785.1	cellular organisms; Bacteria; Terrabacteria group; Actinomycetota; Acidimicrobiia; Acidimicrobiales; Ilumatobacteraceae; Ilumatobacter; Ilumatobacter coccineus; Ilumatobacter coccineus YM16-304
Microlunatus phosphovorus NM-1	GCA_000270245.1	cellular organisms; Bacteria; Terrabacteria group; Actinomycetota; Actinomycetes; Propionibacteriales; Propionibacteriaceae; Microlunatus; Microlunatus phosphovorus; Microlunatus phosphovorus NM-1
Roseiflexus castenholzii DSM 13941	GCA_000017805.1	cellular organisms; Bacteria; Terrabacteria group; Chloroflexota; Chloroflexia; Chloroflexales; Roseiflexineae; Roseiflexaceae; Roseiflexus; Roseiflexus castenholzii; Roseiflexus castenholzii DSM 13941
Roseiflexus sp. RS-1	GCA_000016665.1	cellular organisms; Bacteria; Terrabacteria group; Chloroflexota; Chloroflexia; Chloroflexales; Roseiflexineae; Roseiflexaceae; Roseiflexus; unclassified Roseiflexus; Roseiflexus sp. RS-1
Saccharothrix espanaensis DSM 44229	GCA_000328705.1	cellular organisms; Bacteria; Terrabacteria group; Actinomycetota; Actinomycetes; Pseudonocardiales; Pseudonocardiaceae; Saccharothrix; Saccharothrix espanaensis; Saccharothrix espanaensis DSM 44229
Sanguibacter keddieii DSM 10542	GCA_000024925.1	cellular organisms; Bacteria; Terrabacteria group; Actinomycetota; Actinomycetes; Micrococcales; Sanguibacteraceae; Sanguibacter; Sanguibacter keddieii; Sanguibacter keddieii DSM 10542
Streptantibioticus cattleyicolor NRRL 8057 = DSM 46488	GCA_000240165.1	cellular organisms; Bacteria; Terrabacteria group; Actinomycetota; Actinomycetes; Kitasatosporales; Streptomycetaceae; Streptantibioticus; Streptantibioticus cattleyicolor; Streptantibioticus cattleyicolor NRRL 8057 = DSM 46488
Streptomyces actuosus	GCA_003208035.1	cellular organisms; Bacteria; Terrabacteria group; Actinomycetota; Actinomycetes; Kitasatosporales; Streptomycetaceae; Streptomyces; Streptomyces actuosus
Streptomyces albireticuli	GCA_002192455.1	cellular organisms; Bacteria; Terrabacteria group; Actinomycetota; Actinomycetes; Kitasatosporales; Streptomycetaceae; Streptomyces; Streptomyces albireticuli
Streptomyces alboflavus	GCA_002189675.2	cellular organisms; Bacteria; Terrabacteria group; Actinomycetota; Actinomycetes; Kitasatosporales; Streptomycetaceae; Streptomyces; Streptomyces alboflavus
Streptomyces albus	GCA_000827005.1	cellular organisms; Bacteria; Terrabacteria group; Actinomycetota; Actinomycetes; Kitasatosporales; Streptomycetaceae; Streptomyces; Streptomyces albus
Streptomyces albus	GCA_001753425.1	cellular organisms; Bacteria; Terrabacteria group; Actinomycetota; Actinomycetes; Kitasatosporales; Streptomycetaceae; Streptomyces; Streptomyces albus
Streptomyces alfalfae	GCA_001975025.1	cellular organisms; Bacteria; Terrabacteria group; Actinomycetota; Actinomycetes; Kitasatosporales; Streptomycetaceae; Streptomyces; Streptomyces alfalfae
Streptomyces ambofaciens	GCA_001632865.1	cellular organisms; Bacteria; Terrabacteria group; Actinomycetota; Actinomycetes; Kitasatosporales; Streptomycetaceae; Streptomyces; Streptomyces ambofaciens
Streptomyces ambofaciens ATCC 23877	GCA_001267885.1	cellular organisms; Bacteria; Terrabacteria group; Actinomycetota; Actinomycetes; Kitasatosporales; Streptomycetaceae; Streptomyces; Streptomyces ambofaciens; Streptomyces ambofaciens ATCC 23877
Streptomyces antibioticus	GCA_012044595.1	cellular organisms; Bacteria; Terrabacteria group; Actinomycetota; Actinomycetes; Kitasatosporales; Streptomycetaceae; Streptomyces; Streptomyces antibioticus
Streptomyces anulatus	GCA_001434355.1	cellular organisms; Bacteria; Terrabacteria group; Actinomycetota; Actinomycetes; Kitasatosporales; Streptomycetaceae; Streptomyces; Streptomyces griseus group; Streptomyces anulatus subgroup; Streptomyces anulatus
Streptomyces autolyticus	GCA_001983975.1	cellular organisms; Bacteria; Terrabacteria group; Actinomycetota; Actinomycetes; Kitasatosporales; Streptomycetaceae; Streptomyces; Streptomyces autolyticus
Streptomyces avermitilis MA-4680 = NBRC 14893	GCA_000009765.2	cellular organisms; Bacteria; Terrabacteria group; Actinomycetota; Actinomycetes; Kitasatosporales; Streptomycetaceae; Streptomyces; Streptomyces avermitilis; Streptomyces avermitilis MA-4680 = NBRC 14893
Streptomyces bingchenggensis BCW-1	GCA_000092385.1	cellular organisms; Bacteria; Terrabacteria group; Actinomycetota; Actinomycetes; Kitasatosporales; Streptomycetaceae; Streptomyces; Streptomyces bingchenggensis; Streptomyces bingchenggensis BCW-1
Streptomyces clavuligerus	GCA_001693675.1	cellular organisms; Bacteria; Terrabacteria group; Actinomycetota; Actinomycetes; Kitasatosporales; Streptomycetaceae; Streptomyces; Streptomyces clavuligerus
Streptomyces clavuligerus	GCA_005519465.1	cellular organisms; Bacteria; Terrabacteria group; Actinomycetota; Actinomycetes; Kitasatosporales; Streptomycetaceae; Streptomyces; Streptomyces clavuligerus
Streptomyces coelicolor A3(2)	GCA_000203835.1	cellular organisms; Bacteria; Terrabacteria group; Actinomycetota; Actinomycetes; Kitasatosporales; Streptomycetaceae; Streptomyces; Streptomyces albidoflavus group; Streptomyces coelicolor; Streptomyces coelicolor A3(2)
Streptomyces collinus Tu 365	GCA_000444875.1	cellular organisms; Bacteria; Terrabacteria group; Actinomycetota; Actinomycetes; Kitasatosporales; Streptomycetaceae; Streptomyces; Streptomyces collinus; Streptomyces collinus Tu 365
Streptomyces cyaneogriseus subsp. noncyanogenus	GCA_000931445.1	cellular organisms; Bacteria; Terrabacteria group; Actinomycetota; Actinomycetes; Kitasatosporales; Streptomycetaceae; Streptomyces; Streptomyces cyaneogriseus; Streptomyces cyaneogriseus subsp. noncyanogenus
Streptomyces davaonensis JCM 4913	GCA_000349325.1	cellular organisms; Bacteria; Terrabacteria group; Actinomycetota; Actinomycetes; Kitasatosporales; Streptomycetaceae; Streptomyces; Streptomyces davaonensis; Streptomyces davaonensis JCM 4913
Streptomyces formicae	GCA_002556545.1	cellular organisms; Bacteria; Terrabacteria group; Actinomycetota; Actinomycetes; Kitasatosporales; Streptomycetaceae; Streptomyces; Streptomyces formicae
Streptomyces gilvosporeus	GCA_002082195.1	cellular organisms; Bacteria; Terrabacteria group; Actinomycetota; Actinomycetes; Kitasatosporales; Streptomycetaceae; Streptomyces; Streptomyces gilvosporeus
Streptomyces glaucescens	GCA_000761215.1	cellular organisms; Bacteria; Terrabacteria group; Actinomycetota; Actinomycetes; Kitasatosporales; Streptomycetaceae; Streptomyces; Streptomyces glaucescens
Streptomyces globisporus	GCA_003147545.1	cellular organisms; Bacteria; Terrabacteria group; Actinomycetota; Actinomycetes; Kitasatosporales; Streptomycetaceae; Streptomyces; Streptomyces griseus group; Streptomyces albovinaceus subgroup; Streptomyces globisporus
Streptomyces globisporus C-1027	GCA_000261345.2	cellular organisms; Bacteria; Terrabacteria group; Actinomycetota; Actinomycetes; Kitasatosporales; Streptomycetaceae; Streptomyces; Streptomyces griseus group; Streptomyces albovinaceus subgroup; Streptomyces globisporus; Streptomyces globisporus C-1027
Streptomyces griseochromogenes	GCA_001542625.2	cellular organisms; Bacteria; Terrabacteria group; Actinomycetota; Actinomycetes; Kitasatosporales; Streptomycetaceae; Streptomyces; Streptomyces griseochromogenes
Streptomyces griseus subsp. griseus NBRC 13350	GCA_000010605.1	cellular organisms; Bacteria; Terrabacteria group; Actinomycetota; Actinomycetes; Kitasatosporales; Streptomycetaceae; Streptomyces; Streptomyces griseus group; Streptomyces griseus subgroup; Streptomyces griseus; Streptomyces griseus subsp. griseus; Streptomyces griseus subsp. griseus NBRC 13350
Streptomyces hygroscopicus	GCA_002021875.1	cellular organisms; Bacteria; Terrabacteria group; Actinomycetota; Actinomycetes; Kitasatosporales; Streptomycetaceae; Streptomyces; Streptomyces violaceusniger group; Streptomyces hygroscopicus
Streptomyces hygroscopicus subsp. jinggangensis 5008	GCA_000245355.1	cellular organisms; Bacteria; Terrabacteria group; Actinomycetota; Actinomycetes; Kitasatosporales; Streptomycetaceae; Streptomyces; Streptomyces violaceusniger group; Streptomyces hygroscopicus; Streptomyces hygroscopicus subsp. jinggangensis; Streptomyces hygroscopicus subsp. jinggangensis 5008
Streptomyces hygroscopicus subsp. jinggangensis TL01	GCA_000340845.1	cellular organisms; Bacteria; Terrabacteria group; Actinomycetota; Actinomycetes; Kitasatosporales; Streptomycetaceae; Streptomyces; Streptomyces violaceusniger group; Streptomyces hygroscopicus; Streptomyces hygroscopicus subsp. jinggangensis; Streptomyces hygroscopicus subsp. jinggangensis TL01
Streptomyces hygroscopicus subsp. limoneus	GCA_001447075.1	cellular organisms; Bacteria; Terrabacteria group; Actinomycetota; Actinomycetes; Kitasatosporales; Streptomycetaceae; Streptomyces; Streptomyces violaceusniger group; Streptomyces hygroscopicus; Streptomyces hygroscopicus subsp. limoneus
Streptomyces laurentii	GCA_002355495.1	cellular organisms; Bacteria; Terrabacteria group; Actinomycetota; Actinomycetes; Kitasatosporales; Streptomycetaceae; Streptomyces; Streptomyces laurentii
Streptomyces lavendulae subsp. lavendulae	GCA_002803845.1	cellular organisms; Bacteria; Terrabacteria group; Actinomycetota; Actinomycetes; Kitasatosporales; Streptomycetaceae; Streptomyces; Streptomyces lavendulae; Streptomyces lavendulae subsp. lavendulae
Streptomyces lincolnensis	GCA_001685355.1	cellular organisms; Bacteria; Terrabacteria group; Actinomycetota; Actinomycetes; Kitasatosporales; Streptomycetaceae; Streptomyces; Streptomyces lincolnensis
Streptomyces lividans 1326	GCA_000403665.1	cellular organisms; Bacteria; Terrabacteria group; Actinomycetota; Actinomycetes; Kitasatosporales; Streptomycetaceae; Streptomyces; Streptomyces lividans; Streptomyces lividans 1326
Streptomyces lividans TK24	GCA_000739105.1	cellular organisms; Bacteria; Terrabacteria group; Actinomycetota; Actinomycetes; Kitasatosporales; Streptomycetaceae; Streptomyces; Streptomyces lividans; Streptomyces lividans TK24
Streptomyces lunaelactis	GCA_003054555.1	cellular organisms; Bacteria; Terrabacteria group; Actinomycetota; Actinomycetes; Kitasatosporales; Streptomycetaceae; Streptomyces; Streptomyces lunaelactis
Streptomyces lydicus	GCA_000952035.2	cellular organisms; Bacteria; Terrabacteria group; Actinomycetota; Actinomycetes; Kitasatosporales; Streptomycetaceae; Streptomyces; Streptomyces lydicus
Streptomyces lydicus	GCA_001729485.1	cellular organisms; Bacteria; Terrabacteria group; Actinomycetota; Actinomycetes; Kitasatosporales; Streptomycetaceae; Streptomyces; Streptomyces lydicus
Streptomyces malaysiensis	GCA_006974005.1	cellular organisms; Bacteria; Terrabacteria group; Actinomycetota; Actinomycetes; Kitasatosporales; Streptomycetaceae; Streptomyces; Streptomyces violaceusniger group; Streptomyces malaysiensis
Streptomyces microflavus DSM 40593	GCA_000385945.1	cellular organisms; Bacteria; Terrabacteria group; Actinomycetota; Actinomycetes; Kitasatosporales; Streptomycetaceae; Streptomyces; Streptomyces griseus group; Streptomyces microflavus subgroup; Streptomyces microflavus; Streptomyces microflavus DSM 40593
Streptomyces niveus	GCA_002009175.1	cellular organisms; Bacteria; Terrabacteria group; Actinomycetota; Actinomycetes; Kitasatosporales; Streptomycetaceae; Streptomyces; Streptomyces niveus
Streptomyces niveus NCIMB 11891	GCA_000497425.1	cellular organisms; Bacteria; Terrabacteria group; Actinomycetota; Actinomycetes; Kitasatosporales; Streptomycetaceae; Streptomyces; Streptomyces niveus; Streptomyces niveus NCIMB 11891
Streptomyces nodosus	GCA_008704995.1	cellular organisms; Bacteria; Terrabacteria group; Actinomycetota; Actinomycetes; Kitasatosporales; Streptomycetaceae; Streptomyces; Streptomyces nodosus
Streptomyces noursei	GCA_000695235.1	cellular organisms; Bacteria; Terrabacteria group; Actinomycetota; Actinomycetes; Kitasatosporales; Streptomycetaceae; Streptomyces; Streptomyces noursei
Streptomyces noursei ATCC 11455	GCA_001704275.1	cellular organisms; Bacteria; Terrabacteria group; Actinomycetota; Actinomycetes; Kitasatosporales; Streptomycetaceae; Streptomyces; Streptomyces noursei; Streptomyces noursei ATCC 11455
Streptomyces noursei ZPM	GCA_000963515.1	cellular organisms; Bacteria; Terrabacteria group; Actinomycetota; Actinomycetes; Kitasatosporales; Streptomycetaceae; Streptomyces; Streptomyces noursei; Streptomyces noursei ZPM
Streptomyces pactum	GCA_002005225.1	cellular organisms; Bacteria; Terrabacteria group; Actinomycetota; Actinomycetes; Kitasatosporales; Streptomycetaceae; Streptomyces; Streptomyces pactum
Streptomyces parvulus	GCA_001660045.1	cellular organisms; Bacteria; Terrabacteria group; Actinomycetota; Actinomycetes; Kitasatosporales; Streptomycetaceae; Streptomyces; Streptomyces parvulus
Streptomyces peucetius subsp. caesius ATCC 27952	GCA_002777535.1	cellular organisms; Bacteria; Terrabacteria group; Actinomycetota; Actinomycetes; Kitasatosporales; Streptomycetaceae; Streptomyces; Streptomyces peucetius; Streptomyces peucetius subsp. caesius; Streptomyces peucetius subsp. caesius ATCC 27952
Streptomyces pluripotens	GCA_000802245.2	cellular organisms; Bacteria; Terrabacteria group; Actinomycetota; Actinomycetes; Kitasatosporales; Streptomycetaceae; Streptomyces; Streptomyces pluripotens
Streptomyces pluripotens	GCA_000816465.4	cellular organisms; Bacteria; Terrabacteria group; Actinomycetota; Actinomycetes; Kitasatosporales; Streptomycetaceae; Streptomyces; Streptomyces pluripotens
Streptomyces pristinaespiralis	GCA_001278075.1	cellular organisms; Bacteria; Terrabacteria group; Actinomycetota; Actinomycetes; Kitasatosporales; Streptomycetaceae; Streptomyces; Streptomyces pristinaespiralis
Streptomyces pristinaespiralis ATCC 25486	GCA_000154945.1	cellular organisms; Bacteria; Terrabacteria group; Actinomycetota; Actinomycetes; Kitasatosporales; Streptomycetaceae; Streptomyces; Streptomyces pristinaespiralis; Streptomyces pristinaespiralis ATCC 25486
Streptomyces rapamycinicus NRRL 5491	GCA_000418455.1	cellular organisms; Bacteria; Terrabacteria group; Actinomycetota; Actinomycetes; Kitasatosporales; Streptomycetaceae; Streptomyces; Streptomyces violaceusniger group; Streptomyces rapamycinicus; Streptomyces rapamycinicus NRRL 5491
Streptomyces reticuli	GCA_001511815.1	cellular organisms; Bacteria; Terrabacteria group; Actinomycetota; Actinomycetes; Kitasatosporales; Streptomycetaceae; Streptomyces; Streptomyces reticuli
Streptomyces roseochromogenus subsp. oscitans DS 12.976	GCA_000497445.1	cellular organisms; Bacteria; Terrabacteria group; Actinomycetota; Actinomycetes; Kitasatosporales; Streptomycetaceae; Streptomyces; Streptomyces roseochromogenus; Streptomyces roseochromogenus subsp. oscitans; Streptomyces roseochromogenus subsp. oscitans DS 12.976
Streptomyces rubrolavendulae	GCA_001750785.1	cellular organisms; Bacteria; Terrabacteria group; Actinomycetota; Actinomycetes; Kitasatosporales; Streptomycetaceae; Streptomyces; Streptomyces rubrolavendulae
Streptomyces scabiei 87.22	GCA_000091305.1	cellular organisms; Bacteria; Terrabacteria group; Actinomycetota; Actinomycetes; Kitasatosporales; Streptomycetaceae; Streptomyces; Streptomyces scabiei; Streptomyces scabiei 87.22
Streptomyces sp. 2114.2	GCA_900104935.1	cellular organisms; Bacteria; Terrabacteria group; Actinomycetota; Actinomycetes; Kitasatosporales; Streptomycetaceae; Streptomyces; unclassified Streptomyces; Streptomyces sp. 2114.2
Streptomyces sp. 2323.1	GCA_900221035.1	cellular organisms; Bacteria; Terrabacteria group; Actinomycetota; Actinomycetes; Kitasatosporales; Streptomycetaceae; Streptomyces; unclassified Streptomyces; Streptomyces sp. 2323.1
Streptomyces sp. 3214.6	GCA_900129855.1	cellular organisms; Bacteria; Terrabacteria group; Actinomycetota; Actinomycetes; Kitasatosporales; Streptomycetaceae; Streptomyces; unclassified Streptomyces; Streptomyces sp. 3214.6
Streptomyces sp. 4F	GCA_001484705.1	cellular organisms; Bacteria; Terrabacteria group; Actinomycetota; Actinomycetes; Kitasatosporales; Streptomycetaceae; Streptomyces; unclassified Streptomyces; Streptomyces sp. 4F
Streptomyces sp. 769	GCA_000816025.1	cellular organisms; Bacteria; Terrabacteria group; Actinomycetota; Actinomycetes; Kitasatosporales; Streptomycetaceae; Streptomyces; unclassified Streptomyces; Streptomyces sp. 769
Streptomyces sp. C	GCA_000158895.1	cellular organisms; Bacteria; Terrabacteria group; Actinomycetota; Actinomycetes; Kitasatosporales; Streptomycetaceae; Streptomyces; unclassified Streptomyces; Streptomyces sp. C
Streptomyces sp. CCM_MD2014	GCA_000772045.1	cellular organisms; Bacteria; Terrabacteria group; Actinomycetota; Actinomycetes; Kitasatosporales; Streptomycetaceae; Streptomyces; unclassified Streptomyces; Streptomyces sp. CCM_MD2014
Streptomyces sp. CdTB01	GCA_001484565.1	cellular organisms; Bacteria; Terrabacteria group; Actinomycetota; Actinomycetes; Kitasatosporales; Streptomycetaceae; Streptomyces; unclassified Streptomyces; Streptomyces sp. CdTB01
Streptomyces sp. CMB-StM0423	GCA_002847285.1	cellular organisms; Bacteria; Terrabacteria group; Actinomycetota; Actinomycetes; Kitasatosporales; Streptomycetaceae; Streptomyces; unclassified Streptomyces; Streptomyces sp. CMB-StM0423
Streptomyces sp. CNQ-509	GCA_001011035.1	cellular organisms; Bacteria; Terrabacteria group; Actinomycetota; Actinomycetes; Kitasatosporales; Streptomycetaceae; Streptomyces; unclassified Streptomyces; Streptomyces sp. CNQ-509
Streptomyces sp. fd1-xmd	GCA_002007685.1	cellular organisms; Bacteria; Terrabacteria group; Actinomycetota; Actinomycetes; Kitasatosporales; Streptomycetaceae; Streptomyces; unclassified Streptomyces; Streptomyces sp. fd1-xmd
Streptomyces sp. FR-008	GCA_001431765.1	cellular organisms; Bacteria; Terrabacteria group; Actinomycetota; Actinomycetes; Kitasatosporales; Streptomycetaceae; Streptomyces; unclassified Streptomyces; Streptomyces sp. FR-008
Streptomyces sp. GBA 94-10	GCA_000495635.2	cellular organisms; Bacteria; Terrabacteria group; Actinomycetota; Actinomycetes; Kitasatosporales; Streptomycetaceae; Streptomyces; unclassified Streptomyces; Streptomyces sp. GBA 94-10 4N24
Streptomyces sp. HG99	GCA_002742045.1	cellular organisms; Bacteria; Terrabacteria group; Actinomycetota; Actinomycetes; Kitasatosporales; Streptomycetaceae; Streptomyces; unclassified Streptomyces; Streptomyces sp. HG99
Streptomyces sp. M56	GCA_002812405.1	cellular organisms; Bacteria; Terrabacteria group; Actinomycetota; Actinomycetes; Kitasatosporales; Streptomycetaceae; Streptomyces; unclassified Streptomyces; Streptomyces sp. M56
Streptomyces sp. Mg1	GCA_000412265.2	cellular organisms; Bacteria; Terrabacteria group; Actinomycetota; Actinomycetes; Kitasatosporales; Streptomycetaceae; Streptomyces; unclassified Streptomyces; Streptomyces sp. Mg1
Streptomyces sp. MOE7	GCA_002090335.1	cellular organisms; Bacteria; Terrabacteria group; Actinomycetota; Actinomycetes; Kitasatosporales; Streptomycetaceae; Streptomyces; unclassified Streptomyces; Streptomyces sp. MOE7
Streptomyces sp. NBC_00452	GCA_026341995.1	cellular organisms; Bacteria; Terrabacteria group; Actinomycetota; Actinomycetes; Kitasatosporales; Streptomycetaceae; Streptomyces; unclassified Streptomyces; Streptomyces sp. NBC_00452
Streptomyces sp. NEAU-S7GS2	GCA_003173275.1	cellular organisms; Bacteria; Terrabacteria group; Actinomycetota; Actinomycetes; Kitasatosporales; Streptomycetaceae; Streptomyces; unclassified Streptomyces; Streptomyces sp. NEAU-S7GS2
Streptomyces sp. P3	GCA_003032475.1	cellular organisms; Bacteria; Terrabacteria group; Actinomycetota; Actinomycetes; Kitasatosporales; Streptomycetaceae; Streptomyces; unclassified Streptomyces; Streptomyces sp. P3
Streptomyces sp. PAMC 26508	GCA_000364805.1	cellular organisms; Bacteria; Terrabacteria group; Actinomycetota; Actinomycetes; Kitasatosporales; Streptomycetaceae; Streptomyces; unclassified Streptomyces; Streptomyces sp. PAMC 26508
Streptomyces sp. PVA_94-07	GCA_000495755.1	cellular organisms; Bacteria; Terrabacteria group; Actinomycetota; Actinomycetes; Kitasatosporales; Streptomycetaceae; Streptomyces; unclassified Streptomyces; Streptomyces sp. PVA_94-07
Streptomyces sp. S8	GCA_002094995.1	cellular organisms; Bacteria; Terrabacteria group; Actinomycetota; Actinomycetes; Kitasatosporales; Streptomycetaceae; Streptomyces; unclassified Streptomyces; Streptomyces sp. S8
Streptomyces sp. SAT1	GCA_001654495.1	cellular organisms; Bacteria; Terrabacteria group; Actinomycetota; Actinomycetes; Kitasatosporales; Streptomycetaceae; Streptomyces; unclassified Streptomyces; Streptomyces sp. SAT1
Streptomyces sp. Sge12	GCA_002080455.1	cellular organisms; Bacteria; Terrabacteria group; Actinomycetota; Actinomycetes; Kitasatosporales; Streptomycetaceae; Streptomyces; unclassified Streptomyces; Streptomyces sp. Sge12
Streptomyces sp. SirexAA-E	GCA_000177195.2	cellular organisms; Bacteria; Terrabacteria group; Actinomycetota; Actinomycetes; Kitasatosporales; Streptomycetaceae; Streptomyces; unclassified Streptomyces; Streptomyces sp. SirexAA-E
Streptomyces sp. SM17	GCA_002910725.2	cellular organisms; Bacteria; Terrabacteria group; Actinomycetota; Actinomycetes; Kitasatosporales; Streptomycetaceae; Streptomyces; unclassified Streptomyces; Streptomyces sp. SM17
Streptomyces sp. SM18	GCA_002910775.2	cellular organisms; Bacteria; Terrabacteria group; Actinomycetota; Actinomycetes; Kitasatosporales; Streptomycetaceae; Streptomyces; unclassified Streptomyces; Streptomyces sp. SM18
Streptomyces sp. TLI_053	GCA_900105395.1	cellular organisms; Bacteria; Terrabacteria group; Actinomycetota; Actinomycetes; Kitasatosporales; Streptomycetaceae; Streptomyces; unclassified Streptomyces; Streptomyces sp. TLI_053
Streptomyces sp. TN58	GCA_001941845.1	cellular organisms; Bacteria; Terrabacteria group; Actinomycetota; Actinomycetes; Kitasatosporales; Streptomycetaceae; Streptomyces; unclassified Streptomyces; Streptomyces sp. TN58
Streptomyces sp. Tu6071	GCA_000213055.1	cellular organisms; Bacteria; Terrabacteria group; Actinomycetota; Actinomycetes; Kitasatosporales; Streptomycetaceae; Streptomyces; unclassified Streptomyces; Streptomyces sp. Tu6071
Streptomyces sp. Tue 6075	GCA_001931635.1	cellular organisms; Bacteria; Terrabacteria group; Actinomycetota; Actinomycetes; Kitasatosporales; Streptomycetaceae; Streptomyces; unclassified Streptomyces; Streptomyces sp. Tue 6075
Streptomyces sp. WAC00288	GCA_002943895.1	cellular organisms; Bacteria; Terrabacteria group; Actinomycetota; Actinomycetes; Kitasatosporales; Streptomycetaceae; Streptomyces; unclassified Streptomyces; Streptomyces sp. WAC00288
Streptomyces spongiicola	GCA_003122365.1	cellular organisms; Bacteria; Terrabacteria group; Actinomycetota; Actinomycetes; Kitasatosporales; Streptomycetaceae; Streptomyces; Streptomyces spongiicola
Streptomyces sviceus ATCC 29083	GCA_000154965.1	cellular organisms; Bacteria; Terrabacteria group; Actinomycetota; Actinomycetes; Kitasatosporales; Streptomycetaceae; Streptomyces; Streptomyces sviceus; Streptomyces sviceus ATCC 29083
Streptomyces venezuelae	GCA_001886595.1	cellular organisms; Bacteria; Terrabacteria group; Actinomycetota; Actinomycetes; Kitasatosporales; Streptomycetaceae; Streptomyces; Streptomyces venezuelae
Streptomyces venezuelae	GCA_001443625.1	cellular organisms; Bacteria; Terrabacteria group; Actinomycetota; Actinomycetes; Kitasatosporales; Streptomycetaceae; Streptomyces; Streptomyces venezuelae
Streptomyces venezuelae	GCA_001406115.1	cellular organisms; Bacteria; Terrabacteria group; Actinomycetota; Actinomycetes; Kitasatosporales; Streptomycetaceae; Streptomyces; Streptomyces venezuelae
Streptomyces venezuelae ATCC 10712	GCA_000253235.1	cellular organisms; Bacteria; Terrabacteria group; Actinomycetota; Actinomycetes; Kitasatosporales; Streptomycetaceae; Streptomyces; Streptomyces venezuelae; Streptomyces venezuelae ATCC 10712
Streptomyces vietnamensis	GCA_000830005.1	cellular organisms; Bacteria; Terrabacteria group; Actinomycetota; Actinomycetes; Kitasatosporales; Streptomycetaceae; Streptomyces; Streptomyces vietnamensis
Streptomyces violaceoruber	GCA_002082175.1	cellular organisms; Bacteria; Terrabacteria group; Actinomycetota; Actinomycetes; Kitasatosporales; Streptomycetaceae; Streptomyces; Streptomyces anthocyanicus group; Streptomyces violaceoruber
Streptomyces violaceusniger Tu 4113	GCA_000147815.3	cellular organisms; Bacteria; Terrabacteria group; Actinomycetota; Actinomycetes; Kitasatosporales; Streptomycetaceae; Streptomyces; Streptomyces violaceusniger group; Streptomyces violaceusniger; Streptomyces violaceusniger Tu 4113
Streptomyces xiamenensis	GCA_000993785.3	cellular organisms; Bacteria; Terrabacteria group; Actinomycetota; Actinomycetes; Kitasatosporales; Streptomycetaceae; Streptomyces; Streptomyces xiamenensis

## Sheet: BLAST results 
Reciprocal BLAST search results for CisA homologs. Streptomyces albus J1074 (YP_007743954.1) was used as a query. YP_007743954.1 is closely related to SCO4242/CisA (72% identical).
Organism	Accession	Hit Namea	Hit length (aa)a	Query coveragea	Hit coveragea	E-Valuea	Lineage
Streptomyces nodosus	GCA_008704995.1	CP978_30545	174	0.32	0.805	2e-26	cellular organisms; Bacteria; Terrabacteria group; Actinomycetota; Actinomycetes; Kitasatosporales; Streptomycetaceae; Streptomyces; Streptomyces nodosus
Streptomyces hygroscopicus subsp. jinggangensis TL01	GCA_000340845.1	SHJGH_2186	174	0.32	0.805	7e-24	cellular organisms; Bacteria; Terrabacteria group; Actinomycetota; Actinomycetes; Kitasatosporales; Streptomycetaceae; Streptomyces; Streptomyces violaceusniger group; Streptomyces hygroscopicus; Streptomyces hygroscopicus subsp. jinggangensis; Streptomyces hygroscopicus subsp. jinggangensis TL01
Streptomyces hygroscopicus subsp. jinggangensis 5008	GCA_000245355.1	SHJG_2421	174	0.32	0.805	7e-24	cellular organisms; Bacteria; Terrabacteria group; Actinomycetota; Actinomycetes; Kitasatosporales; Streptomycetaceae; Streptomyces; Streptomyces violaceusniger group; Streptomyces hygroscopicus; Streptomyces hygroscopicus subsp. jinggangensis; Streptomyces hygroscopicus subsp. jinggangensis 5008
Streptomyces pristinaespiralis ATCC 25486	GCA_000154945.1	SSDG_07397	412	0.322	0.335	1e-08	cellular organisms; Bacteria; Terrabacteria group; Actinomycetota; Actinomycetes; Kitasatosporales; Streptomycetaceae; Streptomyces; Streptomyces pristinaespiralis; Streptomyces pristinaespiralis ATCC 25486
Streptomyces autolyticus	GCA_001983975.1	BV401_40240	174	0.34	0.856	2e-22	cellular organisms; Bacteria; Terrabacteria group; Actinomycetota; Actinomycetes; Kitasatosporales; Streptomycetaceae; Streptomyces; Streptomyces autolyticus
Streptomyces malaysiensis	GCA_006974005.1	DNK48_06185	174	0.34	0.856	2e-22	cellular organisms; Bacteria; Terrabacteria group; Actinomycetota; Actinomycetes; Kitasatosporales; Streptomycetaceae; Streptomyces; Streptomyces violaceusniger group; Streptomyces malaysiensis
Streptomyces lydicus	GCA_000952035.2	T261_0321	179	0.358	0.872	2e-35	cellular organisms; Bacteria; Terrabacteria group; Actinomycetota; Actinomycetes; Kitasatosporales; Streptomycetaceae; Streptomyces; Streptomyces lydicus
Streptomyces niveus	GCA_002009175.1	BBN63_07225	177	0.384	0.972	2e-23	cellular organisms; Bacteria; Terrabacteria group; Actinomycetota; Actinomycetes; Kitasatosporales; Streptomycetaceae; Streptomyces; Streptomyces niveus
Streptomyces sp. Sge12	GCA_002080455.1	B6R96_15815	173	0.384	0.965	4e-24	cellular organisms; Bacteria; Terrabacteria group; Actinomycetota; Actinomycetes; Kitasatosporales; Streptomycetaceae; Streptomyces; unclassified Streptomyces; Streptomyces sp. Sge12
Streptomyces lavendulae subsp. lavendulae	GCA_002803845.1	SLAV_36120	171	0.384	0.982	1e-88	cellular organisms; Bacteria; Terrabacteria group; Actinomycetota; Actinomycetes; Kitasatosporales; Streptomycetaceae; Streptomyces; Streptomyces lavendulae; Streptomyces lavendulae subsp. lavendulae
Streptomyces rapamycinicus NRRL 5491	GCA_000418455.1	M271_05290	203	0.447	0.975	2e-25	cellular organisms; Bacteria; Terrabacteria group; Actinomycetota; Actinomycetes; Kitasatosporales; Streptomycetaceae; Streptomyces; Streptomyces violaceusniger group; Streptomyces rapamycinicus; Streptomyces rapamycinicus NRRL 5491
Streptomyces bingchenggensis BCW-1	GCA_000092385.1	SBI_08981	227	0.473	0.916	3e-30	cellular organisms; Bacteria; Terrabacteria group; Actinomycetota; Actinomycetes; Kitasatosporales; Streptomycetaceae; Streptomyces; Streptomyces bingchenggensis; Streptomyces bingchenggensis BCW-1
Streptomyces sp. M56	GCA_002812405.1	CFP59_01347	228	0.477	0.921	3e-29	cellular organisms; Bacteria; Terrabacteria group; Actinomycetota; Actinomycetes; Kitasatosporales; Streptomycetaceae; Streptomyces; unclassified Streptomyces; Streptomyces sp. M56
Streptomyces peucetius subsp. caesius ATCC 27952	GCA_002777535.1	CGZ69_32840	232	0.521	0.983	2e-38	cellular organisms; Bacteria; Terrabacteria group; Actinomycetota; Actinomycetes; Kitasatosporales; Streptomycetaceae; Streptomyces; Streptomyces peucetius; Streptomyces peucetius subsp. caesius; Streptomyces peucetius subsp. caesius ATCC 27952
Streptomyces sp. S8	GCA_002094995.1	A6E92_08170	233	0.548	0.979	2e-33	cellular organisms; Bacteria; Terrabacteria group; Actinomycetota; Actinomycetes; Kitasatosporales; Streptomycetaceae; Streptomyces; unclassified Streptomyces; Streptomyces sp. S8
Streptomyces collinus Tu 365	GCA_000444875.1	B446_06000	233	0.548	0.979	3e-31	cellular organisms; Bacteria; Terrabacteria group; Actinomycetota; Actinomycetes; Kitasatosporales; Streptomycetaceae; Streptomyces; Streptomyces collinus; Streptomyces collinus Tu 365
Streptomyces niveus NCIMB 11891	GCA_000497425.1	M877_04130	263	0.55	0.92	8e-37	cellular organisms; Bacteria; Terrabacteria group; Actinomycetota; Actinomycetes; Kitasatosporales; Streptomycetaceae; Streptomyces; Streptomyces niveus; Streptomyces niveus NCIMB 11891
Streptomyces venezuelae	GCA_001886595.1	vnz_28865	237	0.559	0.983	5e-38	cellular organisms; Bacteria; Terrabacteria group; Actinomycetota; Actinomycetes; Kitasatosporales; Streptomycetaceae; Streptomyces; Streptomyces venezuelae
Streptomyces sp. fd1-xmd	GCA_002007685.1	B1K54_21070	250	0.591	0.984	7e-37	cellular organisms; Bacteria; Terrabacteria group; Actinomycetota; Actinomycetes; Kitasatosporales; Streptomycetaceae; Streptomyces; unclassified Streptomyces; Streptomyces sp. fd1-xmd
Streptomyces sp. TN58	GCA_001941845.1	BSL84_19180	253	0.6	0.988	1e-35	cellular organisms; Bacteria; Terrabacteria group; Actinomycetota; Actinomycetes; Kitasatosporales; Streptomycetaceae; Streptomyces; unclassified Streptomyces; Streptomyces sp. TN58
Streptomyces laurentii	GCA_002355495.1	SLA_6110	262	0.603	0.989	7e-34	cellular organisms; Bacteria; Terrabacteria group; Actinomycetota; Actinomycetes; Kitasatosporales; Streptomycetaceae; Streptomyces; Streptomyces laurentii
Streptomyces globisporus C-1027	GCA_000261345.2	WQO_25125	254	0.603	0.988	8e-37	cellular organisms; Bacteria; Terrabacteria group; Actinomycetota; Actinomycetes; Kitasatosporales; Streptomycetaceae; Streptomyces; Streptomyces griseus group; Streptomyces albovinaceus subgroup; Streptomyces globisporus; Streptomyces globisporus C-1027
Streptomyces sp. Tue 6075	GCA_001931635.1	TK78_09040	254	0.603	0.988	4e-37	cellular organisms; Bacteria; Terrabacteria group; Actinomycetota; Actinomycetes; Kitasatosporales; Streptomycetaceae; Streptomyces; unclassified Streptomyces; Streptomyces sp. Tue 6075
Streptomyces anulatus	GCA_001434355.1	JI76_26880	254	0.603	0.988	4e-38	cellular organisms; Bacteria; Terrabacteria group; Actinomycetota; Actinomycetes; Kitasatosporales; Streptomycetaceae; Streptomyces; Streptomyces griseus group; Streptomyces anulatus subgroup; Streptomyces anulatus
Streptomyces violaceoruber	GCA_002082175.1	B1H20_25710	254	0.603	0.988	2e-35	cellular organisms; Bacteria; Terrabacteria group; Actinomycetota; Actinomycetes; Kitasatosporales; Streptomycetaceae; Streptomyces; Streptomyces anthocyanicus group; Streptomyces violaceoruber
Streptomyces sp. TLI_053	GCA_900105395.1	SAMN05216371_7238	253	0.603	0.988	9e-41	cellular organisms; Bacteria; Terrabacteria group; Actinomycetota; Actinomycetes; Kitasatosporales; Streptomycetaceae; Streptomyces; unclassified Streptomyces; Streptomyces sp. TLI_053
Streptomyces vietnamensis	GCA_000830005.1	SVTN_01530	257	0.61	0.988	9e-40	cellular organisms; Bacteria; Terrabacteria group; Actinomycetota; Actinomycetes; Kitasatosporales; Streptomycetaceae; Streptomyces; Streptomyces vietnamensis
Amycolatopsis mediterranei U32	GCA_000196835.1	AMED_4830	331	0.614	0.843	6e-15	cellular organisms; Bacteria; Terrabacteria group; Actinomycetota; Actinomycetes; Pseudonocardiales; Pseudonocardiaceae; Amycolatopsis; Amycolatopsis mediterranei; Amycolatopsis mediterranei U32
Streptomyces alboflavus	GCA_002189675.2	SMD44_06781	277	0.626	0.996	4e-148	cellular organisms; Bacteria; Terrabacteria group; Actinomycetota; Actinomycetes; Kitasatosporales; Streptomycetaceae; Streptomyces; Streptomyces alboflavus
Streptomyces microflavus DSM 40593	GCA_000385945.1	SFUL_5290	276	0.642	0.971	1e-40	cellular organisms; Bacteria; Terrabacteria group; Actinomycetota; Actinomycetes; Kitasatosporales; Streptomycetaceae; Streptomyces; Streptomyces griseus group; Streptomyces microflavus subgroup; Streptomyces microflavus; Streptomyces microflavus DSM 40593
Actinosynnema mirum DSM 43827	GCA_000023245.1	Amir_2950	331	0.788	0.988	1e-44	cellular organisms; Bacteria; Terrabacteria group; Actinomycetota; Actinomycetes; Pseudonocardiales; Pseudonocardiaceae; Actinosynnema; Actinosynnema mirum; Actinosynnema mirum DSM 43827
Streptomyces sp. 4F	GCA_001484705.1	ASR50_15770	374	0.831	0.984	1e-125	cellular organisms; Bacteria; Terrabacteria group; Actinomycetota; Actinomycetes; Kitasatosporales; Streptomycetaceae; Streptomyces; unclassified Streptomyces; Streptomyces sp. 4F
Streptomyces pactum	GCA_002005225.1	B1H29_20410	355	0.831	0.994	1e-168	cellular organisms; Bacteria; Terrabacteria group; Actinomycetota; Actinomycetes; Kitasatosporales; Streptomycetaceae; Streptomyces; Streptomyces pactum
Streptomyces cyaneogriseus subsp. noncyanogenus	GCA_000931445.1	TU94_25750	248	0.849	0.984	2e-38	cellular organisms; Bacteria; Terrabacteria group; Actinomycetota; Actinomycetes; Kitasatosporales; Streptomycetaceae; Streptomyces; Streptomyces cyaneogriseus; Streptomyces cyaneogriseus subsp. noncyanogenus
Streptomyces sp. 3214.6	GCA_900129855.1	SAMN05444521_4366	389	0.886	0.979	6e-146	cellular organisms; Bacteria; Terrabacteria group; Actinomycetota; Actinomycetes; Kitasatosporales; Streptomycetaceae; Streptomyces; unclassified Streptomyces; Streptomyces sp. 3214.6
Streptomyces sp. Tu6071	GCA_000213055.1	STTU_4743	556	0.932	0.995	9e-137	cellular organisms; Bacteria; Terrabacteria group; Actinomycetota; Actinomycetes; Kitasatosporales; Streptomycetaceae; Streptomyces; unclassified Streptomyces; Streptomyces sp. Tu6071
Streptomyces sp. NBC_00452	GCA_026341995.1	OOK12_00630	541	0.936	0.675	6e-46	cellular organisms; Bacteria; Terrabacteria group; Actinomycetota; Actinomycetes; Kitasatosporales; Streptomycetaceae; Streptomyces; unclassified Streptomyces; Streptomyces sp. NBC_00452
Streptomyces albireticuli	GCA_002192455.1	SMD11_6748	365	0.941	0.962	3e-55	cellular organisms; Bacteria; Terrabacteria group; Actinomycetota; Actinomycetes; Kitasatosporales; Streptomycetaceae; Streptomyces; Streptomyces albireticuli
Streptomyces ambofaciens	GCA_001632865.1	SAM40697_3139	523	0.952	0.803	6e-180	cellular organisms; Bacteria; Terrabacteria group; Actinomycetota; Actinomycetes; Kitasatosporales; Streptomycetaceae; Streptomyces; Streptomyces ambofaciens
Streptomyces glaucescens	GCA_000761215.1	SGLAU_14680	475	0.97	0.987	3e-54	cellular organisms; Bacteria; Terrabacteria group; Actinomycetota; Actinomycetes; Kitasatosporales; Streptomycetaceae; Streptomyces; Streptomyces glaucescens
Catenulispora acidiphila DSM 44928	GCA_000024025.1	Caci_4394	444	0.97	0.973	6e-61	cellular organisms; Bacteria; Terrabacteria group; Actinomycetota; Actinomycetes; Catenulisporales; Catenulisporaceae; Catenulispora; Catenulispora acidiphila; Catenulispora acidiphila DSM 44928
Cellulomonas fimi ATCC 484	GCA_000212695.1	Celf_0156	517	0.973	0.992	1e-43	cellular organisms; Bacteria; Terrabacteria group; Actinomycetota; Actinomycetes; Micrococcales; Cellulomonadaceae; Cellulomonas; Cellulomonas fimi; Cellulomonas fimi ATCC 484
Cellulomonas flavigena DSM 20109	GCA_000092865.1	Cfla_2271	431	0.973	0.988	6e-45	cellular organisms; Bacteria; Terrabacteria group; Actinomycetota; Actinomycetes; Micrococcales; Cellulomonadaceae; Cellulomonas; Cellulomonas flavigena; Cellulomonas flavigena DSM 20109
Streptomyces hygroscopicus subsp. limoneus	GCA_001447075.1	SHL15_0899	394	0.973	0.99	6e-46	cellular organisms; Bacteria; Terrabacteria group; Actinomycetota; Actinomycetes; Kitasatosporales; Streptomycetaceae; Streptomyces; Streptomyces violaceusniger group; Streptomyces hygroscopicus; Streptomyces hygroscopicus subsp. limoneus
Streptomyces venezuelae ATCC 10712	GCA_000253235.1	SVEN_5836	579	0.975	0.993	6e-54	cellular organisms; Bacteria; Terrabacteria group; Actinomycetota; Actinomycetes; Kitasatosporales; Streptomycetaceae; Streptomyces; Streptomyces venezuelae; Streptomyces venezuelae ATCC 10712
Streptomyces griseus subsp. griseus NBRC 13350	GCA_000010605.1	SGR_2078	464	0.975	0.991	2e-51	cellular organisms; Bacteria; Terrabacteria group; Actinomycetota; Actinomycetes; Kitasatosporales; Streptomycetaceae; Streptomyces; Streptomyces griseus group; Streptomyces griseus subgroup; Streptomyces griseus; Streptomyces griseus subsp. griseus; Streptomyces griseus subsp. griseus NBRC 13350
Streptomyces globisporus	GCA_003147545.1	DIJ69_08520	462	0.975	0.991	2e-49	cellular organisms; Bacteria; Terrabacteria group; Actinomycetota; Actinomycetes; Kitasatosporales; Streptomycetaceae; Streptomyces; Streptomyces griseus group; Streptomyces albovinaceus subgroup; Streptomyces globisporus
Streptomyces sp. SM18	GCA_002910775.2	B9S64_08345	401	0.975	0.99	4e-61	cellular organisms; Bacteria; Terrabacteria group; Actinomycetota; Actinomycetes; Kitasatosporales; Streptomycetaceae; Streptomyces; unclassified Streptomyces; Streptomyces sp. SM18
Streptomyces sp. SirexAA-E	GCA_000177195.2	SACTE_1778	388	0.975	0.99	8e-60	cellular organisms; Bacteria; Terrabacteria group; Actinomycetota; Actinomycetes; Kitasatosporales; Streptomycetaceae; Streptomyces; unclassified Streptomyces; Streptomyces sp. SirexAA-E
Streptantibioticus cattleyicolor NRRL 8057 = DSM 46488	GCA_000240165.1	SCATT_p13520	320	0.975	0.988	1e-39	cellular organisms; Bacteria; Terrabacteria group; Actinomycetota; Actinomycetes; Kitasatosporales; Streptomycetaceae; Streptantibioticus; Streptantibioticus cattleyicolor; Streptantibioticus cattleyicolor NRRL 8057 = DSM 46488
Streptomyces sp. PAMC 26508	GCA_000364805.1	F750_5061	443	0.977	0.93	3e-124	cellular organisms; Bacteria; Terrabacteria group; Actinomycetota; Actinomycetes; Kitasatosporales; Streptomycetaceae; Streptomyces; unclassified Streptomyces; Streptomyces sp. PAMC 26508
Streptomyces sp. NEAU-S7GS2	GCA_003173275.1	DKG71_08525	440	0.982	0.984	2e-78	cellular organisms; Bacteria; Terrabacteria group; Actinomycetota; Actinomycetes; Kitasatosporales; Streptomycetaceae; Streptomyces; unclassified Streptomyces; Streptomyces sp. NEAU-S7GS2
Saccharothrix espanaensis DSM 44229	GCA_000328705.1	BN6_51910	391	0.982	0.992	6e-54	cellular organisms; Bacteria; Terrabacteria group; Actinomycetota; Actinomycetes; Pseudonocardiales; Pseudonocardiaceae; Saccharothrix; Saccharothrix espanaensis; Saccharothrix espanaensis DSM 44229
Streptomyces clavuligerus	GCA_001693675.1	BB341_30015	584	0.984	0.985	2e-61	cellular organisms; Bacteria; Terrabacteria group; Actinomycetota; Actinomycetes; Kitasatosporales; Streptomycetaceae; Streptomyces; Streptomyces clavuligerus
Streptomyces clavuligerus	GCA_005519465.1	CRV15_33875	584	0.984	0.985	2e-61	cellular organisms; Bacteria; Terrabacteria group; Actinomycetota; Actinomycetes; Kitasatosporales; Streptomycetaceae; Streptomyces; Streptomyces clavuligerus
Streptomyces venezuelae	GCA_001443625.1	AQF52_7616	389	0.984	0.979	7e-66	cellular organisms; Bacteria; Terrabacteria group; Actinomycetota; Actinomycetes; Kitasatosporales; Streptomycetaceae; Streptomyces; Streptomyces venezuelae
Streptomyces venezuelae	GCA_001406115.1	BN2537_1195	389	0.984	0.979	7e-66	cellular organisms; Bacteria; Terrabacteria group; Actinomycetota; Actinomycetes; Kitasatosporales; Streptomycetaceae; Streptomyces; Streptomyces venezuelae
Streptomyces sp. WAC00288	GCA_002943895.1	C5L38_06920	369	0.984	0.978	8e-64	cellular organisms; Bacteria; Terrabacteria group; Actinomycetota; Actinomycetes; Kitasatosporales; Streptomycetaceae; Streptomyces; unclassified Streptomyces; Streptomyces sp. WAC00288
Streptomyces scabiei 87.22	GCA_000091305.1	SCAB_27721	490	0.989	0.976	3e-162	cellular organisms; Bacteria; Terrabacteria group; Actinomycetota; Actinomycetes; Kitasatosporales; Streptomycetaceae; Streptomyces; Streptomyces scabiei; Streptomyces scabiei 87.22
Streptomyces sp. SAT1	GCA_001654495.1	A8713_23045	501	0.993	0.992	7e-160	cellular organisms; Bacteria; Terrabacteria group; Actinomycetota; Actinomycetes; Kitasatosporales; Streptomycetaceae; Streptomyces; unclassified Streptomyces; Streptomyces sp. SAT1
Streptomyces formicae	GCA_002556545.1	KY5_5450c	408	0.993	0.968	8e-82	cellular organisms; Bacteria; Terrabacteria group; Actinomycetota; Actinomycetes; Kitasatosporales; Streptomycetaceae; Streptomyces; Streptomyces formicae
Streptomyces albus	GCA_000827005.1	SLNWT_2275	564	0.995	0.996	7e-148	cellular organisms; Bacteria; Terrabacteria group; Actinomycetota; Actinomycetes; Kitasatosporales; Streptomycetaceae; Streptomyces; Streptomyces albus
Streptomyces albus	GCA_001753425.1	SLNHY_2273	564	0.995	0.996	7e-148	cellular organisms; Bacteria; Terrabacteria group; Actinomycetota; Actinomycetes; Kitasatosporales; Streptomycetaceae; Streptomyces; Streptomyces albus
Streptomyces ambofaciens ATCC 23877	GCA_001267885.1	SAM23877_3458	526	0.998	0.998	0	cellular organisms; Bacteria; Terrabacteria group; Actinomycetota; Actinomycetes; Kitasatosporales; Streptomycetaceae; Streptomyces; Streptomyces ambofaciens; Streptomyces ambofaciens ATCC 23877
Streptomyces parvulus	GCA_001660045.1	Spa2297_15040	491	0.998	0.996	0	cellular organisms; Bacteria; Terrabacteria group; Actinomycetota; Actinomycetes; Kitasatosporales; Streptomycetaceae; Streptomyces; Streptomyces parvulus
Streptomyces sp. CCM_MD2014	GCA_000772045.1	NI25_21520	474	0.998	0.996	0	cellular organisms; Bacteria; Terrabacteria group; Actinomycetota; Actinomycetes; Kitasatosporales; Streptomycetaceae; Streptomyces; unclassified Streptomyces; Streptomyces sp. CCM_MD2014
Streptomyces coelicolor A3(2)	GCA_000203835.1	SCO4242	468	0.998	0.996	0	cellular organisms; Bacteria; Terrabacteria group; Actinomycetota; Actinomycetes; Kitasatosporales; Streptomycetaceae; Streptomyces; Streptomyces albidoflavus group; Streptomyces coelicolor; Streptomyces coelicolor A3(2)
Streptomyces lividans TK24	GCA_000739105.1	SLIV_17175	468	0.998	0.996	0	cellular organisms; Bacteria; Terrabacteria group; Actinomycetota; Actinomycetes; Kitasatosporales; Streptomycetaceae; Streptomyces; Streptomyces lividans; Streptomyces lividans TK24
Streptomyces sp. 2114.2	GCA_900104935.1	SAMN05428941_4354	468	0.998	0.996	0	cellular organisms; Bacteria; Terrabacteria group; Actinomycetota; Actinomycetes; Kitasatosporales; Streptomycetaceae; Streptomyces; unclassified Streptomyces; Streptomyces sp. 2114.2
Streptomyces lividans 1326	GCA_000403665.1	SLI_4479	468	0.998	0.996	0	cellular organisms; Bacteria; Terrabacteria group; Actinomycetota; Actinomycetes; Kitasatosporales; Streptomycetaceae; Streptomyces; Streptomyces lividans; Streptomyces lividans 1326
Streptomyces sp. PVA_94-07	GCA_000495755.1	B590_04005	440	1	1	0	cellular organisms; Bacteria; Terrabacteria group; Actinomycetota; Actinomycetes; Kitasatosporales; Streptomycetaceae; Streptomyces; unclassified Streptomyces; Streptomyces sp. PVA_94-07
Streptomyces sp. GBA 94-10	GCA_000495635.2	B591_03900	440	1	1	0	cellular organisms; Bacteria; Terrabacteria group; Actinomycetota; Actinomycetes; Kitasatosporales; Streptomycetaceae; Streptomyces; unclassified Streptomyces; Streptomyces sp. GBA 94-10 4N24
Streptomyces sp. FR-008	GCA_001431765.1	SFR_0869	438	1	1	0	cellular organisms; Bacteria; Terrabacteria group; Actinomycetota; Actinomycetes; Kitasatosporales; Streptomycetaceae; Streptomyces; unclassified Streptomyces; Streptomyces sp. FR-008
Streptomyces sp. SM17	GCA_002910725.2	B9S66_26900	438	1	1	0	cellular organisms; Bacteria; Terrabacteria group; Actinomycetota; Actinomycetes; Kitasatosporales; Streptomycetaceae; Streptomyces; unclassified Streptomyces; Streptomyces sp. SM17
Streptomyces xiamenensis	GCA_000993785.3	SXIM_21450	416	1	1	6e-141	cellular organisms; Bacteria; Terrabacteria group; Actinomycetota; Actinomycetes; Kitasatosporales; Streptomycetaceae; Streptomyces; Streptomyces xiamenensis
aValues obtained using the sequence of Streptomyces albus J1074 (YP_007743954.1) as query. YP_007743954.1 (SFR_0861) is closely related to the SCO4242 (72% identical).
Organisms/sequences shaded in grey were removed from the final alignment (Extended Data Figure 9b) because of insufficient coverage of the cytosolic domain of CisA (SCO4242)
