# Supplementary material for: Function and firing of the Streptomyces coelicolor contractile injection system requires the membrane protein CisA
Source: eLife. 2025 Jul 8;14:RP104064. doi: 10.7554/eLife.104064 (PMC12237407; doi:10.7554/eLife.104064)
Supplement: Figure 4—source data 1. [file elife-104064-fig4-data1.xlsx]

## Sheet: Sheet1
CisA C-terminal domain (AA285-468)
# of AF3 runs	1		2		3		4		5
protomer	pTM	ipTM	pTM	ipTM	pTM	ipTM	pTM	ipTM	pTM	ipTM
1	0.83		0.83		0.83		0.83		0.83
2	0.44	0.08	0.44	0.1	0.44	0.11	0.44	0.09	0.44	0.08
3	0.3	0.1	0.3	0.1	0.3	0.11	0.3	0.1	0.29	0.1
4	0.29	0.15	0.3	0.15	0.3	0.15	0.31	0.15	0.3	0.15
5	0.73	0.7	0.73	0.7	0.74	0.71	0.72	0.69	0.73	0.7
6	0.63	0.59	0.61	0.57	0.61	0.56	0.62	0.57	0.62	0.57
7	0.3	0.22	0.3	0.21	0.3	0.22	0.31	0.23	0.34	0.26
8	0.27	0.19	0.29	0.21	0.29	0.21	0.31	0.24	0.28	0.21
