# Supplementary material for: Function and firing of the Streptomyces coelicolor contractile injection system requires the membrane protein CisA
Source: eLife. 2025 Jul 8;14:RP104064. doi: 10.7554/eLife.104064 (PMC12237407; doi:10.7554/eLife.104064)
Supplement: Figure 5—figure supplement 2—source data 1. [file elife-104064-fig5-figsupp2-data1.xlsx]

## Sheet: Sporulation assay
Figure 5-figure supplement 2-source data 1. Raw data for Figure 5-figure supplement 2
	OD640 (A/mg)
Time (hours)	WT			ΔcisA			ΔcisA/cisA+
18	9.82887e-05	0.000118389	0.000144272	0.000146	0.000132	0.000148	0.00016	0.000319	9.02e-05
24	0.00034	0.00032	0.000434	0.000147	0.000185	0.000134	0.0003002	0.000391	0.000489
42	0.001115	0.001141	0.001089	0.00023	0.000304	0.000285	0.000922654	0.001071	0.0010559
48	0.001617	0.001241	0.001347	0.000317	0.000307	0.000346	0.001171	0.0009198	0.00123346
66	0.003803	0.003286	0.004002	0.001319	0.001306	0.00132	0.0030031	0.0031887	0.0039125
72	0.004015	0.003555	0.003938	0.00137	0.001394	0.001447	0.0032415	0.0035507	0.0039233
