# Supplementary material for: Function and firing of the Streptomyces coelicolor contractile injection system requires the membrane protein CisA
Source: eLife. 2025 Jul 8;14:RP104064. doi: 10.7554/eLife.104064 (PMC12237407; doi:10.7554/eLife.104064)
Supplement: Figure 5—source data 1. [file elife-104064-fig5-data1.xlsx]

## Sheet: Viability assay
Figure 5-source data 1. Raw data for Figure 5 c/d
Area ratio(sfGFP/FM5-95)
No Stress									+ Nisin
WT/sfGFP			ΔcisA/sfGFP			ΔcisA/cisA+/sfGFP			WT/sfGFP			ΔcisA/sfGFP			ΔcisA/cisA+/sfGFP
0.972755	1.02835	0.884211	0.940288	0.973097	0.953006	0.904615	0.929247	0.965703	0.529103	0.532464	0.46413	0.90728	0.949373	1.02299	0.426273	0.63114	0.477582
0.901707	0.924137	0.984625	0.913019	0.947502	0.974459	0.949927	1.00003	0.982017	0.535597	0.449917	0.556277	1.00609	0.9986	0.966434	0.497018	0.501222	0.641026
0.958997	0.964926	0.995381	0.921381	1.01198	0.983697	0.956175	1.00005	0.992346	0.466368	0.485822	0.593668	1.00782	0.886735	0.809294	0.362134	0.722222	0.417112
0.903393	0.892931	0.990256	0.901512	0.996116	0.983377	0.962921	0.919121	0.977943	0.549793	0.672701	0.427611	0.989583	0.911756	0.943957	0.709686	0.502315	0.47033
0.97134	0.9886	0.974091	0.95122	0.990898	0.887185	0.992392	0.922921	0.985165	0.572595	0.610623	0.482768	0.905482	0.991589	0.96741	0.509118	0.400999	0.521791
0.983019	0.933475	0.97246	0.949102	1.00748	0.888657	0.984508	0.948726	1.0002	0.526316	0.650578	0.565024	1.00189	0.881635	0.905444	0.512093	0.61538	0.70076
0.973886	0.951753	0.917749	1.00971	1.00059	0.928571	1.03037	1.00003	0.996521	0.62807	0.652303	0.429254	1.00824	0.883484	1.01476	0.517769	0.500215	0.485208
0.940102	0.848895	0.999502	0.976323	0.959702	0.937415	1.03502	1.00992	1.0081	0.651986	0.705463	0.460421	0.854016	0.950754	0.883179	0.705593	0.397115	0.689043
0.868041	0.983288	0.952846	1.03079	0.945144	0.937785	0.944635	1.00095	1.00032	0.584774	0.508236	0.391894	0.952941	0.92766	0.913182	0.553846	0.584578	0.5339
0.904607	0.886143	0.994096	0.950057	0.992068	0.94128	1.00038	0.929923	0.970934	0.637058	0.480886	0.530096	0.898668	0.997285	0.932839	0.489439	0.501941	0.501571
0.851322	0.966232	0.993199	0.940515	1.00097	0.919763	0.986092	0.909185	1.00025	0.517757	0.509399	0.513172	0.967611	0.999587	0.928491	0.512484	0.483234	0.440858
0.963509	0.954918	1.02222	0.990927	0.992804	0.896683	0.971722	0.96112	0.995062	0.484774	0.463221	0.414783	0.989247	0.966419	0.853723	0.373107	0.408195	0.524818
0.887279	0.990833	0.986965	0.999037	0.979932	1.00954	1.00014	1.00105	0.955556	0.629142	0.569192	0.666837	1.00297	0.979214	0.945041	0.604911	0.497296	0.519069
0.869136	0.929971	0.98494	1.00214	0.988902	0.93045	1.00304	0.979202	0.899538	0.644126	0.51676	0.686355	0.966296	1.0399	0.829587	0.490945	0.535108	0.489154
0.932948	0.875282	0.988032	0.949115	0.992031	1.00377	1.02553	0.982013	0.937167	0.651986	0.541355	0.605282	0.92289	0.801442	0.944969	0.438862	0.608617	0.523597
0.898891	0.975387	0.948519	0.876578	0.978495	0.915335	0.992917	0.988025	0.978565	0.608286	0.66389	0.468595	0.931707	0.838386	0.937949	0.393248	0.632226	0.437828
1.01078	0.964915	0.961252	0.995438	0.986513	0.975964	0.982101	1.0007	0.985771	0.681749	0.473305	0.53056	0.881081	0.918599	0.952537	0.371034	0.508265	0.514044
0.945946	1.00191	0.962075	1.00629	1.0081	1.01709	1.02037	0.986673	1.00004	0.580909	0.565422	0.489288	0.926006	0.866895	0.9171	0.68125	0.501379	0.518707
0.91517	0.927075	0.994102	0.938172	1.01194	0.970667	1.00005	0.900344	0.924576	0.643026	0.694045	0.462282	1.00882	0.957593	0.86177	0.501404	0.532962	0.522561
0.989388	0.978302	0.945999	0.891725	1.00666	0.973282	0.971702	0.909649	0.924242	0.461848	0.548895	0.512698	0.910859	0.921681	1.01104	0.614761	0.625499	0.481818
0.979757	0.985703	0.920364	0.988435	1.00668	0.992145	1.00374	0.919197	0.987509	0.640094	0.579537	0.372354	0.903226	0.907004	1.02662	0.52188	0.485579	0.433071
0.864407	0.951188	0.989595	0.93305	0.958242	0.975524	0.992238	0.919522	0.971347	0.450054	0.406888	0.563669	0.90333	0.919975	0.973723	0.50809	0.606383	0.670051
0.962792	1.00735	0.951515	1.00789	0.975161	0.933941	0.955611	0.960048	0.98735	0.49809	0.468712	0.680522	0.868906	0.944476	0.932339	0.659974	0.500168	0.369329
0.990912	1.00237	0.965534	0.958007	0.906847	0.983434	0.950937	0.985091	0.974645	0.463662	0.612522	0.449574	1.0043	0.844986	0.974866	0.392857	0.57143	0.676568
0.89462	0.958425	0.980583	0.86209	0.99443	0.969215	1.02275	0.93	1.00032	0.584302	0.460588	0.478972	0.931807	0.956811	0.885927	0.500976	0.500001	0.485882
0.881745	1.00079	1.00542	0.99588	0.980099	1.00085	0.978	0.910001	0.986442	0.560458	0.568274	0.556481	0.916237	0.942109	1.00315	0.57229	0.513389	0.500123
1.00752	0.965733	0.864417	0.970085	0.964608	0.913433	1.00579	0.93007	0.991196	0.480932	0.491965	0.549978	0.922369	0.897179	0.985044	0.748085	0.62616	0.531341
0.927007	0.968763	0.999729	0.914163	0.943061	0.974874	0.962613	0.917158	0.982804	0.51459	0.477554	0.581453	0.949153	0.909947	0.99874	0.392205	0.583069	0.52028
0.973886	0.958774	1.0171	0.994295	0.998938	0.971944	1.00174	0.91805	0.907317	0.468446	0.598724	0.615465	0.973311	0.910346	1.03479	0.714765	0.503232	0.378908
0.924332	0.98382	0.957145	0.996894	0.996453	0.940297	0.983734	0.92936	1.00047	0.529222	0.547222	0.363245	0.88279	0.863493	0.808398	0.501942	0.4375	0.65625
0.927047	0.95567	0.980712	0.884731	0.959637	0.929433	1.02073	0.989051	0.96885	0.582286	0.48913	0.619048	0.931418	0.957921	0.991422	0.589511	0.427586	0.500184
0.964396	1.01234	0.890855	0.94777	1.00424	1.00582	1.00401	0.950082	0.910755	0.474982	0.484188	0.477728	0.90633	0.889438	0.990023	0.435976	0.508869	0.487917
0.964141	0.894635	0.969271	0.974474	0.99462	0.953447	1.00426	0.929294	1.00018	0.498305	0.558096	0.462446	0.96705	1.00419	1.05372	0.500141	0.404187	0.50897
0.971119	0.911811	0.909396	0.954738	0.981138	0.933926	1.00351	0.979519	0.952259	0.421024	0.644341	0.558824	0.915643	0.972559	1.04268	0.521053	0.411215	0.433333
0.927724	0.948366	0.970326	0.95369	0.964981	0.940249	1.03852	0.977797	0.980528	0.512369	0.544452	0.502326	0.888158	1.0098	0.992774	0.500042	0.503256	0.500328
0.916367	1.00163	0.959036	1.01998	0.934641	0.892455	1.00016	0.940001	0.991781	0.476008	0.495463	0.625064	0.998472	0.913185	1.03004	0.406759	0.50221	0.501639
0.981333	0.948572	0.978718	0.998133	0.992805	0.893205	1.0037	0.979904	0.974747	0.503947	0.601442	0.617992	0.863636	0.9952	0.952054	0.437006	0.540017	0.646186
0.96246	0.940517	0.96088	0.992997	0.964627	0.986911	1.00063	0.979986	0.964066	0.641694	0.690206	0.465923	0.9578	1.00767	1.01468	0.53294	0.530769	0.510256
0.894231	0.954545	0.923346	0.983551	0.974251	0.903926	1.00375	0.967018	0.962281	0.464722	0.667516	0.608946	0.955907	0.972074	0.999314	0.638991	0.50001	0.500018
0.872642	0.961743	0.880811	0.941128	1.00958	0.92872	1.01483	0.944028	0.869054	0.562633	0.513484	0.506888	1.03051	0.95575	0.972069	0.505771	0.738791	0.519681
0.939394	0.981196	0.925914	0.973853	0.99901	0.967955	1.00003	0.981217	0.865048	0.519139	0.462398	0.554853	0.927083	0.958221	1.00203	0.509241	0.703138	0.514061
0.917355	0.976202	0.955556	0.916534	0.990531	0.910884	0.996102	0.916521	0.999022	0.448658	0.655226	0.428762	0.946093	0.979161	1.00033	0.489755	0.40177	0.465529
0.967822	0.949756	0.917619	1.01135	0.910659	0.946552	1.00209	0.988217	0.954545	0.502997	0.493879	0.657455	0.883171	0.822892	1.0081	0.427113	0.534104	0.51797
0.95389	1.00079	0.977069	1.00127	1.00129	0.914943	0.994947	0.995097	1.00065	0.511401	0.643634	0.485631	0.858733	0.973394	0.982794	0.469565	0.451909	0.538079
0.928571	0.99297	0.936268	0.992165	0.958143	0.997019	1.00522	0.950004	0.986154	0.548433	0.507392	0.410731	0.91293	0.995848	1.00004	0.520638	0.719945	0.553566
0.9575	0.92973	0.964969	0.994126	0.906484	0.930142	1.00707	0.919209	0.906422	0.497016	0.459117	0.563701	0.991013	0.871092	1.02967	0.583333	0.403863	0.513424
0.88412	0.913206	0.874686	0.945672	0.980997	0.996558	1.00058	0.940003	0.933333	0.647858	0.529105	0.462721	0.924547	0.891408	0.871751	0.500122	0.655138	0.550126
0.877717	0.918139	0.985079	0.992599	1.0177	0.983651	0.992201	0.909582	1.00017	0.549406	0.569691	0.418787	0.94254	0.995028	1.02005	0.596109	0.49731	0.558685
0.994194	0.98669	1.00926	0.992518	0.999248	0.907791	1.01389	0.9681	0.970058	0.468435	0.467773	0.520728	0.928918	0.902989	1.01076	0.534021	0.688889	0.517637
0.977809	0.993839	0.972271	0.961538	0.992938	0.897654	1.00069	0.980357	0.900004	0.494638	0.588062	0.519368	0.870113	0.88736	1.00003	0.54748	0.578218	0.480596
0.974517	0.910843	0.953704	0.905172	0.990531	0.987234	0.991785	1.0018	0.923919	0.579747	0.527927	0.59393	0.929391	1.00597	0.96401	0.400448	0.646193	0.529557
0.964653	0.982618	0.975124	0.998015	0.961219	0.887848	1.01204	0.940025	0.95187	0.459818	0.546459	0.478314	0.926342	0.97643	0.940438	0.573718	0.559313	0.466399
0.965067	0.996419	1.00917	0.952381	0.968415	0.897166	0.98021	0.983502	0.940584	0.477381	0.611384	0.444583	0.902256	0.932468	1.08053	0.510032	0.390284	0.502908
0.865121	0.976571	0.988539	1.00507	0.999291	0.989021	0.991062	1.0008	0.910659	0.545181	0.477647	0.608282	0.961448	0.926051	1.00429	0.411569	0.426276	0.514217
1.02864	0.940283	0.930769	1.00042	0.996293	0.962029	0.992177	1.00046	0.917148	0.622744	0.465411	0.593682	0.963614	0.931716	1.06418	0.683785	0.586474	0.429224
0.893275	0.966688	0.901203	0.993952	0.863934	0.874505	1.0011	1.00022	0.947519	0.441599	0.472722	0.448738	0.898824	0.972609	1.03823	0.445936	0.376316	0.515121
0.946317	0.934206	0.993023	0.965663	1.01918	0.931135	1.00014	0.988285	0.951479	0.546667	0.472378	0.568935	0.957277	1.00222	1.00704	0.500329	0.428768	0.524937
0.989764	0.909619	0.991017	0.994764	1.01013	0.989376	0.942659	0.995682	0.96896	0.414791	0.482079	0.616106	0.933161	0.925192	0.982498	0.544512	0.488158	0.504918
0.94864	1.02502	0.989893	0.986301	0.954978	0.966602	0.910121	1.0007	1.00008	0.487395	0.699434	0.519384	0.982287	1.00854	0.849852	0.619979	0.52279	0.491096
0.937202	1.0042	0.985584	0.99853	0.980686	0.966719	0.939109	0.960041	0.982752	0.510528	0.454149	0.459494	0.914394	1.02151	0.94902	0.51596	0.512492	0.482645
0.965989	0.889866	0.989148	0.997249	1.00802	1.01649	0.949033	0.976644	0.918232	0.503277	0.619264	0.56112	1.0073	0.954968	1.05	0.707194	0.514374	0.382941
0.922875	0.878621	0.970601	0.992422	0.934159	0.997168	1.00012	0.991754	0.90409	0.56724	0.532348	0.391117	0.996424	1.00067	1.0068	0.533894	0.599307	0.460704
1.02404	0.948743	0.986626	0.976348	0.953184	0.899456	0.992912	1.00064	0.982135	0.451474	0.59256	0.545534	1.00454	0.930387	0.932856	0.6112	0.520535	0.500476
0.978507	0.881739	0.995047	0.935484	0.896889	0.995302	0.95517	0.909103	0.978682	0.440466	0.642293	0.468835	0.861604	0.976713	1.00045	0.465664	0.513889	0.451794
0.998715	0.965043	0.870542	0.992977	0.930881	0.968348	0.984256	0.981345	0.90303	0.468639	0.68915	0.488411	0.975469	0.85927	0.902757	0.500581	0.521519	0.450112
0.944618	0.919921	0.977807	0.958333	0.939659	0.86758	0.939061	0.970572	0.943297	0.575883	0.533827	0.496013	0.935005	0.849421	1.06001	0.486101	0.50251	0.426517
0.962682	0.956759	0.97561	0.981928	0.941819	1.01502	0.908188	1.00035	1.00032	0.472574	0.59251	0.363516	1.01689	0.976664	1.00286	0.436862	0.400427	0.510513
1.00567	0.891524	1.00628	0.994198	0.975143	1.00168	1.00258	0.917461	0.90333	0.55006	0.44486	0.479176	0.987108	0.932712	0.968706	0.400986	0.419801	0.614423
0.923219	0.903261	0.959599	0.995727	1.00972	1.00841	0.979225	0.925507	0.914453	0.610125	0.458336	0.589462	0.918047	0.98038	0.875384	0.513231	0.512982	0.482313
0.894895	0.989033	0.880508	0.995838	0.950056	0.950604	1.00007	0.891475	0.904698	0.671165	0.520591	0.446648	0.870791	0.906139	1.00755	0.51951	0.46595	0.522105
0.95458	0.980148	0.979852	0.99364	0.923077	0.964747	0.969016	1.00011	1.00008	0.686786	0.46987	0.531462	0.93951	0.998156	0.954311	0.41128	0.464927	0.50136
0.972152	0.989605	0.941882	0.992599	0.971185	1.01111	1.0004	0.871627	0.918247	0.574066	0.553643	0.678133	0.92744	0.925161	0.918404	0.411422	0.43322	0.726619
0.956838	0.965739	0.986453	0.995011	0.959446	0.99329	0.949989	1.00061	0.95859	0.545887	0.481912	0.422374	0.928571	0.865223	0.859648	0.500031	0.597222	0.510142
0.991515	0.997467	1.00488	0.993544	0.969381	0.966473	0.929201	0.994211	0.981672	0.473716	0.490069	0.418352	0.991792	0.886095	0.989108	0.425532	0.501381	0.500786
0.988275	0.984231	0.915314	0.999146	0.871495	0.861665	1.0009	1.00181	0.981061	0.609244	0.43268	0.535211	1.00542	0.971608	1.00485	0.500024	0.452209	0.577982
0.980343	0.987598	0.99409	0.993462	0.923565	1.03419	0.996249	0.891537	0.946893	0.42901	0.402817	0.489166	0.838992	0.872976	1.00311	0.591538	0.355507	0.645155
0.880076	1.01888	0.901213	1.0067	0.946314	0.985432	1.00647	0.892152	1.00011	0.585194	0.538761	0.671922	0.949464	0.941276	0.999001	0.401245	0.566667	0.508824
0.920436	1.01215	0.901425	0.934325	0.94789	1.02663	1.01001	0.878121	0.958355	0.489937	0.452885	0.448225	0.844242	0.850267	1.00011	0.631579	0.451282	0.40101
0.971546	0.974746	0.99111	0.994189	0.860203	0.915455	0.959157	0.999912	0.962351	0.562649	0.57785	0.40842	0.9299	0.85185	0.971662	0.576923	0.727273	0.506102
0.977878	0.952152	0.992172	0.997596	0.965021	0.988679	0.979363	0.869431	0.955285	0.469761	0.649895	0.458865	1.005	0.841413	0.963862	0.521648	0.450043	0.534495
0.927467	0.910931	0.991023	0.99348	0.943923	0.975531	0.986355	1.00098	0.951042	0.392776	0.49595	0.553622	0.944742	1.03965	1.07001	0.528766	0.473333	0.582876
0.99958	0.934624	1.001	0.993688	0.989546	0.960244	0.960926	0.909138	0.965028	0.572006	0.538091	0.430946	1.00147	0.930701	1.00788	0.586399	0.501138	0.522262
0.921953	0.868464	0.971774	0.96875	0.864868	1.00694	0.978358	0.927888	0.967462	0.616706	0.597291	0.372695	0.900322	1.04732	0.876348	0.510117	0.517365	0.5
0.991484	0.999316	0.963691	0.961538	0.995385	0.995831	1.00001	0.972387	0.941913	0.503928	0.614203	0.502502	0.931575	0.974624	0.845264	0.451569	0.453498	0.529674
0.978713	1.01328	0.870861	0.989848	1.00795	0.974052	0.994292	0.869123	0.9628	0.424974	0.516066	0.520531	0.928739	0.93039	1.002	0.41179	0.437986	0.516239
0.960317	0.874179	0.960166	0.944444	0.891873	0.986538	0.956338	0.976479	0.967908	0.490169	0.465252	0.541374	1.00604	0.946464	0.904945	0.481805	0.496774	0.500259
0.928817	0.898658	0.920275	0.997272	0.986657	1.00255	0.986637	0.931297	0.915025	0.511918	0.36434	0.454034	0.937529	0.909051	0.924079	0.502195	0.427434	0.639808
0.947852	1.01089	0.909091	0.99768	0.984131	0.863636	0.962209	0.939527	0.965025	0.489553	0.475643	0.593263	0.909167	0.948617	1.00012	0.472619	0.420984	0.458252
1.00681	0.978928	0.974608	0.994022	0.969478	1.00714	0.971092	0.92486	0.948374	0.555924	0.532014	0.440385	0.936159	1.01635	0.803502	0.419094	0.440843	0.667003
1.01554	0.979215	1.0041	0.896797	0.977397	0.982456	0.919174	1.00832	1.00001	0.598173	0.647856	0.528955	0.976914	0.916984	0.849104	0.573801	0.678161	0.5008
0.978899	0.999438	0.968182	0.983785	0.994745	0.984277	1.0004	0.973539	0.989699	0.492019	0.578202	0.540056	0.860349	0.961875	0.959867	0.518993	0.462274	0.41108
1.01192	0.992965	0.940397	0.995475	0.882065	0.933333	0.976566	1.00019	0.948506	0.454212	0.428319	0.563319	0.936841	0.971151	1.00693	0.473501	0.676249	0.4522
1.00032	0.927784	1.00015	0.854269	0.992102	0.971821	0.908298	0.897073	0.969072	0.400192	0.494621	0.463672	0.924733	0.940265	1.00303	0.439678	0.420647	0.500108
0.97721	0.979003	0.994642	0.959412	0.958258	0.906943	0.909218	0.984519	0.929312	0.527834	0.497326	0.628386	0.86969	0.892373	0.998683	0.451831	0.431821	0.507093
0.999216	1.0001	0.89571	0.97561	0.930075	0.952	0.973306	0.966667	0.963821	0.568294	0.453968	0.52936	0.864082	0.915558	0.960159	0.500135	0.450939	0.528446
0.951339	0.973492	0.991742	0.950249	0.92986	1.00796	1.00001	0.97487	0.99352	0.44229	0.647868	0.396353	0.861982	0.948442	1.01008	0.498029	0.452263	0.492958
1.00001	0.949893	0.940801	0.992229	0.961776	1.00194	1.00011	0.982359	1.00003	0.632819	0.627328	0.446584	0.919355	0.936806	1.02004	0.47382	0.506806	0.396648
0.959128	0.989274	0.992671	1.0069	0.953403	0.942117	0.92959	1.00401	0.989527	0.602099	0.697937	0.449447	0.898111	0.999023	0.951025	0.500015	0.47274	0.491667
1.01902	0.995823	0.992178	0.885714	0.967191	0.998321	1.00059	0.913092	0.996029	0.482918	0.53993	0.393501	0.978833	0.997493	0.923307	0.53811	0.479649	0.500003
0.972375	0.984757	1.00021	0.978005	0.999312	1.01222	0.979121	1.01001	0.96983	0.539335	0.482896	0.421716	0.899258	0.949145	0.918798	0.490294	0.420547	0.445969
