# Supplementary material for: Function and firing of the Streptomyces coelicolor contractile injection system requires the membrane protein CisA
Source: eLife. 2025 Jul 8;14:RP104064. doi: 10.7554/eLife.104064 (PMC12237407; doi:10.7554/eLife.104064)
Supplement: Figure 5—source data 2. [file elife-104064-fig5-data2.xlsx]

## Sheet: Sporulation assay
Figure 5-source data 2. Raw data for Figure 5 f
	log10 counts of colony-forming units (c.f.u.)
Time (hours)	48			72			96
WT	860	834	912	1221	1180	1278	4700000000	5200000000	5900000000
ΔcisA	1150	1020	1187	8.66667e+07	8.76667e+07	8.96667e+07	6100000000	6300000000	7000000000
ΔcisA/cisA+	901	915	911	2191	2410	1878	4900000000	5000000000	5300000000
