# Supplementary material for: Function and firing of the Streptomyces coelicolor contractile injection system requires the membrane protein CisA
Source: eLife. 2025 Jul 8;14:RP104064. doi: 10.7554/eLife.104064 (PMC12237407; doi:10.7554/eLife.104064)
Supplement: Figure 6—figure supplement 1—source data 1. [file elife-104064-fig6-figsupp1-data1.xlsx]

## Sheet: LazyAF-CisA
Figure 6-figure supplement 1-source data 1. LazyAF output with confidence scores for in silico prediction of protein-protein interactions between monomeric CisA and CISSc components.
Protein 1	Protein_2	pTM	ipTM	Ranking_confidence	Description	CIS
SCO4242	SCO4242	0.27	0.16	0.182	adaptor
SCO4243	SCO4242	0.31	0.38	0.366	baseplate wedge	Cis12
SCO4244	SCO4242	0.56	0.71	0.68	baseplate wedge	Cis11
SCO4245	SCO4242	0.31	0.33	0.326	baseplate wedge	Cis9
SCO4246	SCO4242	0.54	0.43	0.452	spike	Cis8
SCO4247	SCO4242	0.32	0.19	0.216		Cis7
SCO4248	SCO4242	0.31	0.35	0.342
SCO4249	SCO4242	0.32	0.18	0.208
SCO4250	SCO4242	0.26	0.3	0.292
SCO4251	SCO4242	0.32	0.31	0.312
SCO4252	SCO4242	0.34	0.21	0.236	tube	Cis1a
SCO4253	SCO4242	0.45	0.24	0.282	sheath	Cis2
SCO4254	SCO4242	0.44	0.2	0.248
SCO4255	SCO4242	0.32	0.19	0.216
SCO4256	SCO4242	0.41	0.46	0.45	effectors
SCO4257	SCO4242	0.43	0.46	0.454	effectors
SCO4258	SCO4242	0.43	0.46	0.454	effectors
SCO4259	SCO4242	0.49	0.17	0.234		Cis15
SCO4260	SCO4242	0.34	0.35	0.348	cap	Cis16
